# Supplementary material for: Size-Segregated Particulate Mass and Carbonaceous Components in Roadside and Riverside Environments
Source: MDPI journal article supplement (doi:10.3390/app112110214), 2021-10-31
Supplement: s1 [file s1]

# Size-Segregated Particulate Mass and Carbonaceous Components in Roadside and Riverside Environments

## Supplementary Figure

**Figure S1.** Sampling site in roadside, riverside, and peatland area in Jambi city, Indonesia.

**Figure S2.** Maps of hotspot and air mass trajectories during sampling time in Jambi city, Indonesia (a) roadside (August 2nd–9th) and (b) riverside (August 7th–13th).

## Supplementary Table

**Table S1.** Sampling site, time, and its meteorological condition in Jambi city.

**Table S2.** Daily total number of vehicles in roadside at diurnal and nocturnal in Jambi city.

**Table S3.** The comparison of  $PM_{0.1}$  in Jambi city and other cities in Indonesia and South East Asian (SEA) countries.

**Table S4.** Pearson correlation between types of vehicles and each particle sizes and PM categories.

**Table S5.** Pearson correlation between types of vehicles, mass of PMs, and their carbonaceous component at diurnal and nocturnal.

**Table S6.** Pearson correlation between the daily number of hotspots in southern part of Sumatera Island with daily mass of PMs, and their carbonaceous component at RS and RV sites.

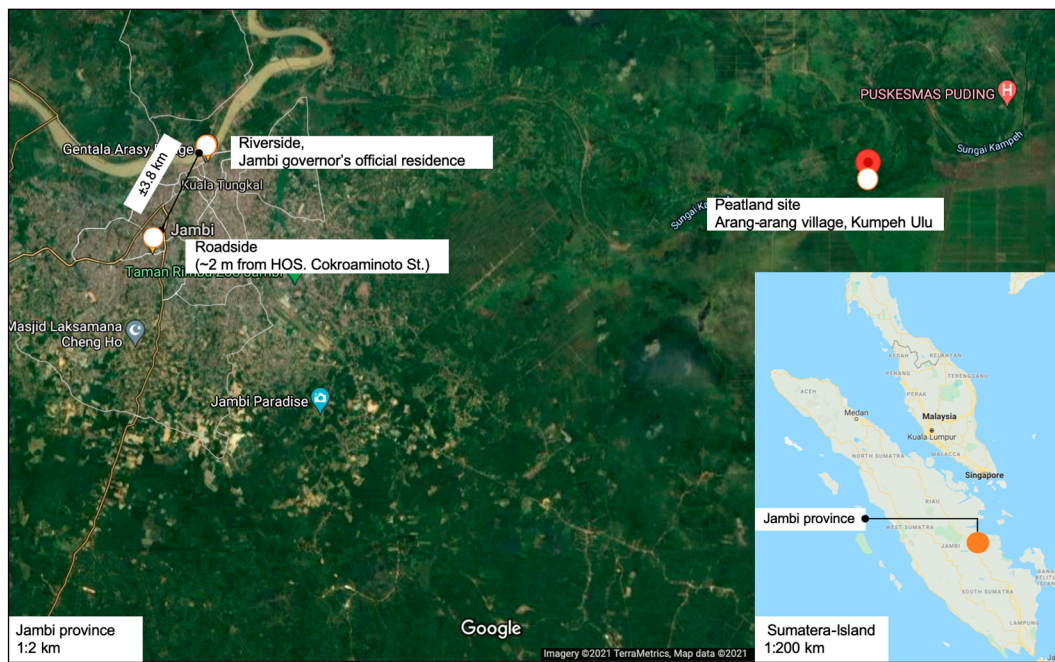

**Figure S1.** Sampling site in roadside, riverside, and peatland area in Jambi city, Indonesia.

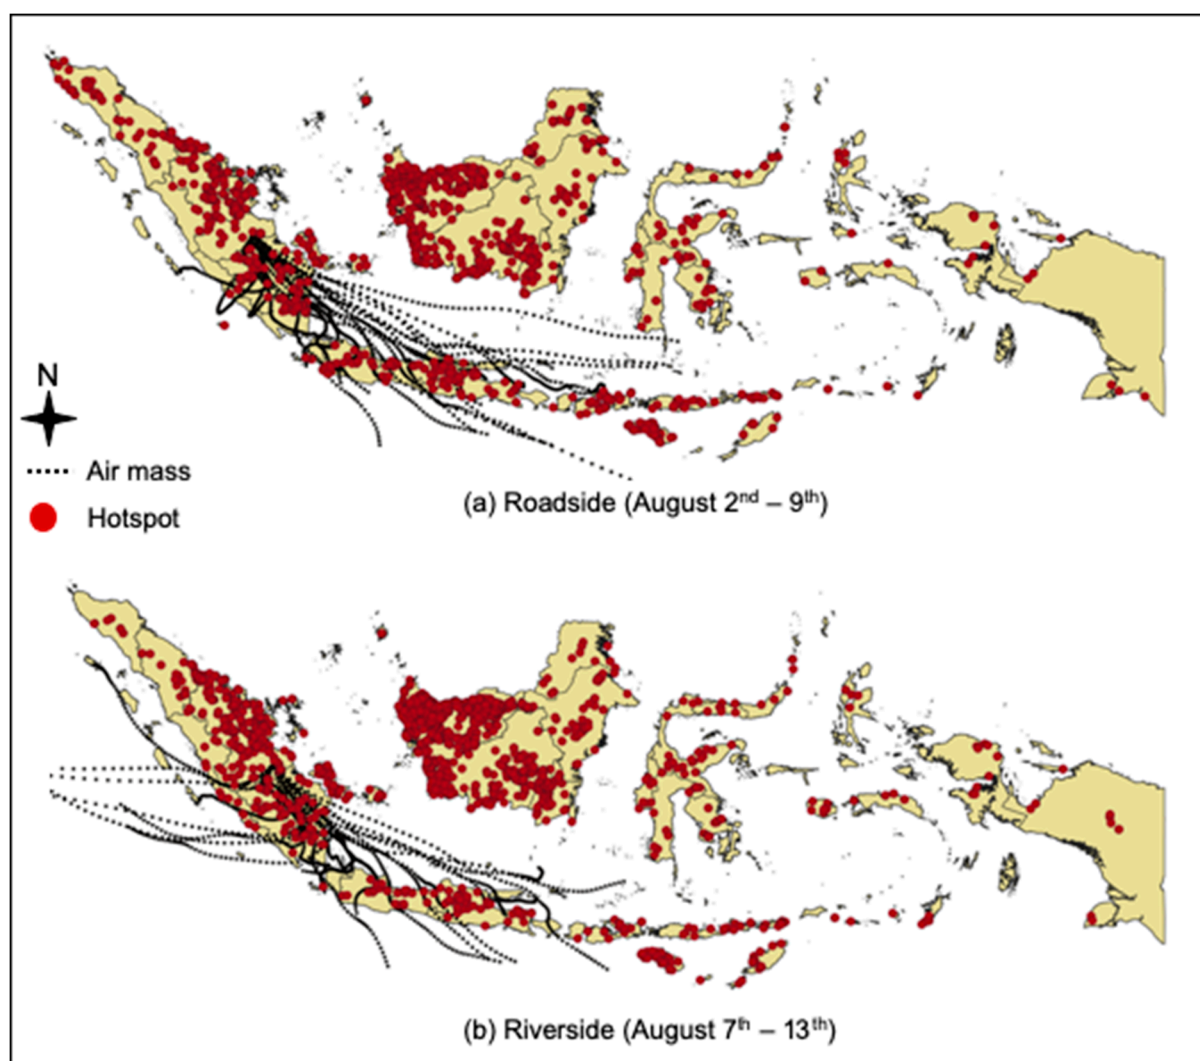

**Figure S2.** Maps of hotspot and air mass trajectories during sampling time in Jambi city, Indonesia (a) roadside (August 2<sup>nd</sup>–9<sup>th</sup>) and (b) riverside (August 7<sup>th</sup>–13<sup>th</sup>).

**Table S1.** Sampling site, time, and its meteorological condition in Jambi city.

| Location         | Term      | Date<br>(August<br>2019) | Time<br>(hours) | Total<br>(n) | Temp<br>(°C) | Humidity<br>(%) | Pressure<br>(kPa) | Wind<br>Speed<br>(m/s) |
|------------------|-----------|--------------------------|-----------------|--------------|--------------|-----------------|-------------------|------------------------|
| <b>Roadside</b>  | Diurnal   | 2nd–8th                  | 11–12           | 7            | 32.4<br>±0.7 | 48.2<br>±3.3    | 100.9<br>±0.2     | 1 ± 0.2                |
|                  | Nocturnal | 2nd–9th                  | 11–12           | 7            | 26.9<br>±0.3 | 61.4<br>±11.4   | 100.9<br>±0.2     | 1 ± 0.2                |
| <b>Riverside</b> | Diurnal   | 7th–12th                 | 11–12           | 6            | 31.9<br>±0.6 | 48.2<br>±3.5    | 100.9<br>±0.2     | 1 ± 0.5                |
|                  | Nocturnal | 7th–13th                 | 11–12           | 6            | 25.4<br>±0.3 | 61.4<br>±10.6   | 100.9<br>±0.2     | 1 ± 0.4                |

**Table S2.** Daily total number of vehicles in roadside during day and nighttime and its ratio in Jambi city.

| RS         | Diurnal (D)    |                  |                  | Nocturnal (N)  |                  |                  | D/N            |                  |                  |
|------------|----------------|------------------|------------------|----------------|------------------|------------------|----------------|------------------|------------------|
|            | Motor<br>Cycle | Light<br>Vehicle | Heavy<br>Vehicle | Motor<br>Cycle | Light<br>Vehicle | Heavy<br>Vehicle | Motor<br>Cycle | Light<br>Vehicle | Heavy<br>Vehicle |
|            |                | (LV)             | (HV)             |                | (LV)             | (HV)             |                | (LV)             | (HV)             |
| <b>n1</b>  | 30602          | 15022            | 625              | 13108          | 6151             | 591              | 2.33           | 2.44             | 1.06             |
| <b>n2</b>  | 24398          | 16533            | 741              | 17195          | 7079             | 378              | 1.42           | 2.34             | 1.96             |
| <b>n3</b>  | 24034          | 14678            | 258              | 11036          | 5907             | 418              | 2.18           | 2.48             | 0.62             |
| <b>n4</b>  | 29592          | 15081            | 758              | 11432          | 5402             | 620              | 2.59           | 2.79             | 1.22             |
| <b>n5</b>  | 30857          | 14047            | 653              | 13734          | 5797             | 397              | 2.25           | 2.42             | 1.64             |
| <b>n6</b>  | 28810          | 13818            | 626              | 14163          | 5414             | 511              | 2.03           | 2.55             | 1.23             |
| <b>n7</b>  | 23520          | 13621            | 501              | 14358          | 6056             | 440              | 1.64           | 2.25             | 1.14             |
| <b>Ave</b> | 27402          | 14686            | 595              | 13575          | 5972             | 479              | 2.06           | 2.47             | 1.27             |

**Table S3.** The comparison of PM<sub>0.1</sub> in Jambi city and other cities in Indonesia and South East Asian (SEA) countries.

| Location                     | Site Description          | Concentration<br>( $\mu\text{g}/\text{m}^3$ ) | Reference          |
|------------------------------|---------------------------|-----------------------------------------------|--------------------|
| North Sumatera,<br>Indonesia | Urban traffic-day         | $15.6 \pm 6.1$                                | Putri et al., 2021 |
|                              | Urban traffic-night       | $10.7 \pm 2.0$                                |                    |
|                              | Industry area             | $16.8 \pm 4.0$                                |                    |
|                              | School environment        | $15.9 \pm 1.6$                                |                    |
|                              | Rural-volcano             | $7.10 \pm 2.5$                                |                    |
| Bangkok, Thailand            | Urban-traffic             | 7.7                                           | Zhao et al., 2016  |
| Hat Yai, Thailand            | Mixed                     | 10.9                                          |                    |
| Hanoi, Vietnam               | Urban-traffic             | 6.06–11.9                                     | Thuy et al., 2018  |
| Jambi, Indonesia             | Urban traffic-day         | $14.0 \pm 1.6$                                | This study         |
|                              | Urban traffic-night       | $24.7 \pm 2.9$                                |                    |
|                              | Mixed, riverside-day      | $10.6 \pm 3.1$                                |                    |
|                              | Mixed,<br>riverside-night | $15.6 \pm 3.8$                                |                    |

**Table S4.** Pearson correlation between the number of each type of vehicles and particle mass concentration (PMC) of each size range and PM category.

| Vehicles/PMC      | Durnal |             |       |       | Nocturnal |       |       |       |
|-------------------|--------|-------------|-------|-------|-----------|-------|-------|-------|
|                   | MC     | LV          | HV    | TV    | MC        | LV    | HV    | TV    |
| <0.1              | -0.31  | 0.35        | -0.42 | -0.21 | 0.10      | 0.34  | -0.09 | 0.16  |
| 0.1–0.5           | -0.14  | 0.59        | -0.36 | 0.02  | -0.05     | 0.34  | 0.33  | 0.05  |
| 0.5–1             | 0.09   | 0.28        | 0.45  | 0.19  | -0.53     | -0.28 | 0.04  | -0.51 |
| 1–2.5             | -0.17  | <b>0.89</b> | 0.25  | 0.11  | 0.14      | 0.48  | -0.48 | 0.21  |
| 2.5–10            | 0.19   | 0.45        | 0.28  | 0.33  | -0.09     | 0.21  | 0.29  | -0.01 |
| >10               | 0.48   | -0.41       | 0.03  | 0.34  | 0.65      | 0.37  | -0.67 | 0.61  |
| PM <sub>0.5</sub> | -0.24  | <b>0.50</b> | -0.42 | -0.11 | 0.02      | 0.36  | 0.14  | 0.11  |
| PM <sub>1</sub>   | -0.14  | <b>0.65</b> | -0.03 | 0.05  | -0.19     | 0.15  | 0.12  | -0.12 |
| PM <sub>2.5</sub> | -0.16  | <b>0.80</b> | 0.09  | 0.08  | -0.05     | 0.31  | -0.14 | 0.02  |
| PM <sub>10</sub>  | 0.00   | <b>0.70</b> | 0.19  | 0.21  | -0.07     | 0.35  | -0.08 | 0.02  |
| TSP               | 0.07   | <b>0.62</b> | 0.19  | 0.26  | 0.07      | 0.41  | -0.22 | 0.14  |

Description:

MC : motorcycles

LV : light vehicles

HV : heavy vehicles

TV : total vehicles (MC+LV+HV)

**Table S5.** Pearson correlation between types of vehicles, mass of PMs, and their carbonaceous component at diurnal and nocturnal.

| Parameters  | Diurnal |       |             |             | Nocturnal |       |       |       |
|-------------|---------|-------|-------------|-------------|-----------|-------|-------|-------|
|             | <0.1 μm |       |             |             |           |       |       |       |
|             | MC      | LV    | HV          | TV          | MC        | LV    | HV    | TV    |
| OC          | -0.56   | -0.41 | -0.28       | -0.68       | -0.18     | 0.07  | -0.55 | -0.16 |
| EC          | 0.47    | 0.24  | <b>0.82</b> | <b>0.57</b> | -0.17     | -0.24 | -0.12 | -0.21 |
| OC/EC       | -0.70   | -0.38 | -0.81       | -0.83       | -0.06     | 0.40  | -0.74 | 0.01  |
| soot-EC     | -0.06   | -0.21 | <b>0.52</b> | -0.09       | -0.46     | -0.41 | -0.34 | -0.49 |
| soot-EC/TC  | 0.35    | 0.03  | <b>0.70</b> | 0.38        | -0.43     | -0.78 | 0.47  | -0.53 |
| soot-EC/PMC | 0.14    | -0.34 | <b>0.53</b> | 0.07        | -0.54     | -0.60 | -0.24 | -0.61 |

| Parameters  | 0.5–1 μm |       |       |       |       |       |       |       |
|-------------|----------|-------|-------|-------|-------|-------|-------|-------|
|             | MC       | LV    | HV    | TV    | MC    | LV    | HV    | TV    |
|             | OC       | 0.08  | -0.37 | 0.15  | -0.02 | -0.24 | -0.04 | -0.31 |
| EC          | 0.35     | -0.32 | 0.17  | 0.25  | -0.52 | -0.49 | 0.22  | -0.54 |
| OC/EC       | -0.48    | 0.18  | -0.07 | -0.42 | 0.10  | 0.13  | -0.35 | 0.10  |
| soot-EC     | 0.23     | -0.40 | 0.19  | 0.12  | -0.30 | -0.34 | -0.18 | -0.34 |
| soot-EC/TC  | 0.13     | -0.41 | 0.23  | 0.02  | 0.09  | -0.31 | 0.22  | 0.02  |
| soot-EC/PMC | 0.21     | -0.44 | 0.08  | 0.08  | -0.11 | -0.28 | -0.19 | -0.17 |

| Parameters  | 1–2.5 μm |       |       |       |       |       |             |       |
|-------------|----------|-------|-------|-------|-------|-------|-------------|-------|
|             | MC       | LV    | HV    | TV    | MC    | LV    | HV          | TV    |
|             | OC       | -0.40 | -0.38 | -0.16 | -0.51 | -0.51 | -0.49       | 0.09  |
| EC          | -0.44    | -0.58 | -0.22 | -0.61 | -0.51 | -0.23 | 0.83        | -0.45 |
| OC/EC       | 0.25     | 0.48  | 0.19  | 0.39  | -0.05 | -0.21 | -0.41       | -0.10 |
| soot-EC     | -0.45    | -0.50 | -0.16 | -0.59 | -0.56 | -0.56 | <b>0.60</b> | -0.57 |
| soot-EC/TC  | -0.23    | -0.53 | 0.11  | -0.37 | 0.03  | -0.22 | <b>0.61</b> | 0.00  |
| soot-EC/PMC | -0.43    | -0.55 | -0.18 | -0.59 | -0.50 | -0.56 | <b>0.66</b> | -0.52 |

| Parameters  | 2.5–10 μm |       |       |       |       |       |       |       |
|-------------|-----------|-------|-------|-------|-------|-------|-------|-------|
|             | MC        | LV    | HV    | TV    | MC    | LV    | HV    | TV    |
|             | OC        | 0.43  | 0.05  | 0.14  | 0.44  | -0.66 | -0.09 | -0.13 |
| EC          | 0.23      | 0.48  | 0.28  | 0.38  | -0.54 | 0.04  | -0.11 | -0.45 |
| OC/EC       | 0.18      | -0.25 | -0.03 | 0.10  | -0.46 | -0.42 | 0.19  | -0.47 |
| soot-EC     | 0.39      | -0.31 | 0.35  | 0.30  | -0.66 | -0.09 | -0.06 | -0.58 |
| soot-EC/TC  | -0.24     | -0.63 | -0.02 | -0.42 | -0.26 | -0.27 | 0.62  | -0.26 |
| soot-EC/PMC | 0.12      | -0.61 | 0.00  | -0.07 | -0.65 | -0.08 | -0.08 | -0.57 |

| Parameters  | >10 μm |       |       |       |       |             |             |       |
|-------------|--------|-------|-------|-------|-------|-------------|-------------|-------|
|             | MC     | LV    | HV    | TV    | MC    | LV          | HV          | TV    |
|             | OC     | 0.33  | 0.16  | 0.43  | 0.39  | 0.21        | <b>0.74</b> | -0.24 |
| EC          | 0.33   | 0.17  | 0.40  | 0.39  | 0.34  | <b>0.78</b> | -0.54       | 0.45  |
| OC/EC       | 0.09   | -0.19 | 0.48  | 0.06  | -0.47 | -0.38       | 0.73        | -0.46 |
| soot-EC     | 0.31   | 0.15  | 0.40  | 0.36  | 0.30  | 0.76        | -0.44       | 0.41  |
| soot-EC/TC  | 0.05   | -0.32 | -0.02 | -0.04 | 0.08  | -0.18       | -0.22       | 0.02  |
| soot-EC/PMC | 0.30   | 0.16  | 0.40  | 0.36  | 0.10  | 0.65        | -0.32       | 0.22  |

Description:

MC : motorcycles

LV : light vehicles

HV : heavy vehicles

TV : total vehicles (MC+LV+HV)

PMC : mass concentration

N/A : not analyses



**Table S6.** Pearson correlation between the daily number of hotspots in southern part of Sumatera Island with daily mass of PMs, and their carbonaceous component at RS and RV sites.

| <b>Particle size</b> | <b>Location</b> |           |
|----------------------|-----------------|-----------|
| <b>&lt;0.1</b>       | <b>RS</b>       | <b>RV</b> |
| PMC                  | 0.66            | -0.46     |
| OC                   | -0.12           | -0.28     |
| EC                   | 0.32            | -0.11     |
| OC/EC                | -0.33           | -0.23     |
| <b>0.1–0.5</b>       | <b>RS</b>       | <b>RV</b> |
| PMC                  | <b>0.77</b>     | -0.28     |
| OC                   | N/A             | N/A       |
| EC                   | N/A             | N/A       |
| OC/EC                | N/A             | N/A       |
| <b>0.5–1</b>         | <b>RS</b>       | <b>RV</b> |
| PMC                  | 0.29            | -0.42     |
| OC                   | -0.11           | -0.73     |
| EC                   | 0.06            | -0.34     |
| OC/EC                | -0.08           | -0.58     |
| <b>1–2.5</b>         | <b>RS</b>       | <b>RV</b> |
| PMC                  | 0.37            | -0.28     |
| OC                   | -0.11           | -0.62     |
| EC                   | -0.24           | -0.16     |
| OC/EC                | 0.40            | -0.24     |
| <b>2.5–10</b>        | <b>RS</b>       | <b>RV</b> |
| PMC                  | 0.03            | -0.25     |
| OC                   | -0.07           | -0.25     |
| EC                   | 0.06            | 0.52      |
| OC/EC                | -0.06           | -0.36     |
| <b>&gt;10</b>        | <b>RS</b>       | <b>RV</b> |
| PMC                  | 0.08            | -0.46     |
| OC                   | 0.00            | -0.37     |
| EC                   | -0.10           | -0.48     |
| OC/EC                | 0.11            | 0.18      |
